# Supplementary material for: Practical delta check limits for tumour markers in different clinical settings
Source: publisher site journal article supplement (doi:10.1515/cclm-2022-1098), 2023-03-30
Supplement: Supplementary file 1 [file j_cclm-2022-1098_suppl_003.docx]

**Supplemental Figure 1**. Decision cut-off values for delta check method selection. The CV% of the absDD indicates an index of the variation range of each tumour marker. Thus, this means that the “percentage” representation is more useful for the larger value of CV% of the absDD than the difference, which is useful for the smaller value of CV% of the absDD. Pearson’s r correlation coefficient was used to assess the relationship between the tumour markers and time. Notably, values closer to 1 demonstrate a greater association with time, and RD or RPC is useful in these cases. However, RPC is more appropriate if the calculated values are higher than both the CV% of the absDD and Pearson’s r cut-off values, while DD is appropriate if the calculated values are lower than the cut-off values. Furthermore, DPC is appropriate if the calculated value is higher than the CV% of the absDD cut-off only, and RD is appropriate if the calculated value is higher than Pearson’s r cut-off only.
